# Supplementary material
Source: publisher site journal article supplement (https://www.dovepress.com/article/228138)
Supplement: Supplementary file 1 [file get_supplementary_file.php]

**Supplementary Table 1. The 2×2 contingency table for pseudo-progression and LDH**

(A)

|  | PsPD (n = 4) | TPD (n = 21) | p-value |
| --- | --- | --- | --- |
| Pre-treatment LDH ≥202 U/L | 2 | 21 | 0.02 |
| Pre-treatment LDH <202 U/L | 2 | 0 |  |

(B)

|  | PsPD (n = 4) | TPD (n = 21) | p-value |
| --- | --- | --- | --- |
| Post-treatment LDH ≥288 U/L | 0 | 13 | 0.039 |
| Post-treatment LDH <288 U/L | 4 | 8 |  |

**Abbreviations:** LDH, lactate dehydrogenase; PsPD, pseudo-progression; TPD, true progressive disease.


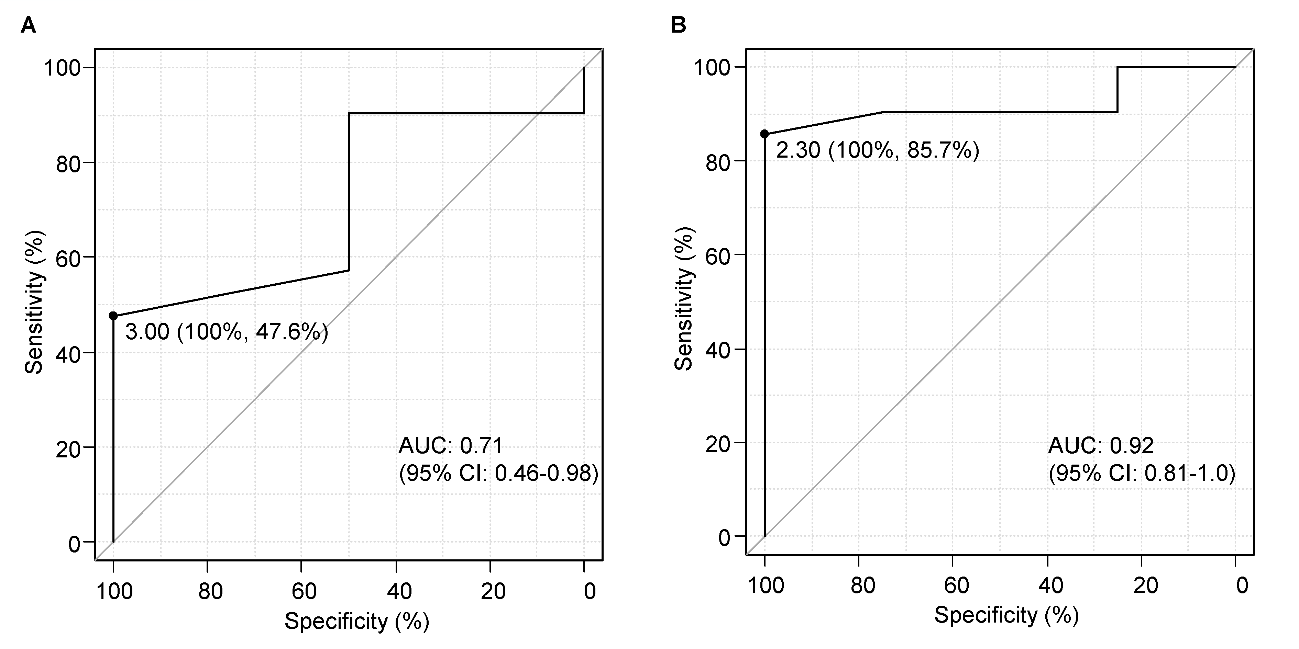
**Supplementary Figure 1. Receiver operating characteristic (ROC) curve analysis for the derived neutrophil-to-lymphocyte ratio (dNLR).** (A) Pre-treatment and (B) post-treatment dNLR. The analysis was performed to determine the most appropriate dNLR cut-off value that could identify patients with pseudo-progression. The sensitivity and specificity values were computed to determine the cut-off point that would maximize the sum of the number of true positive and true negative predictions.


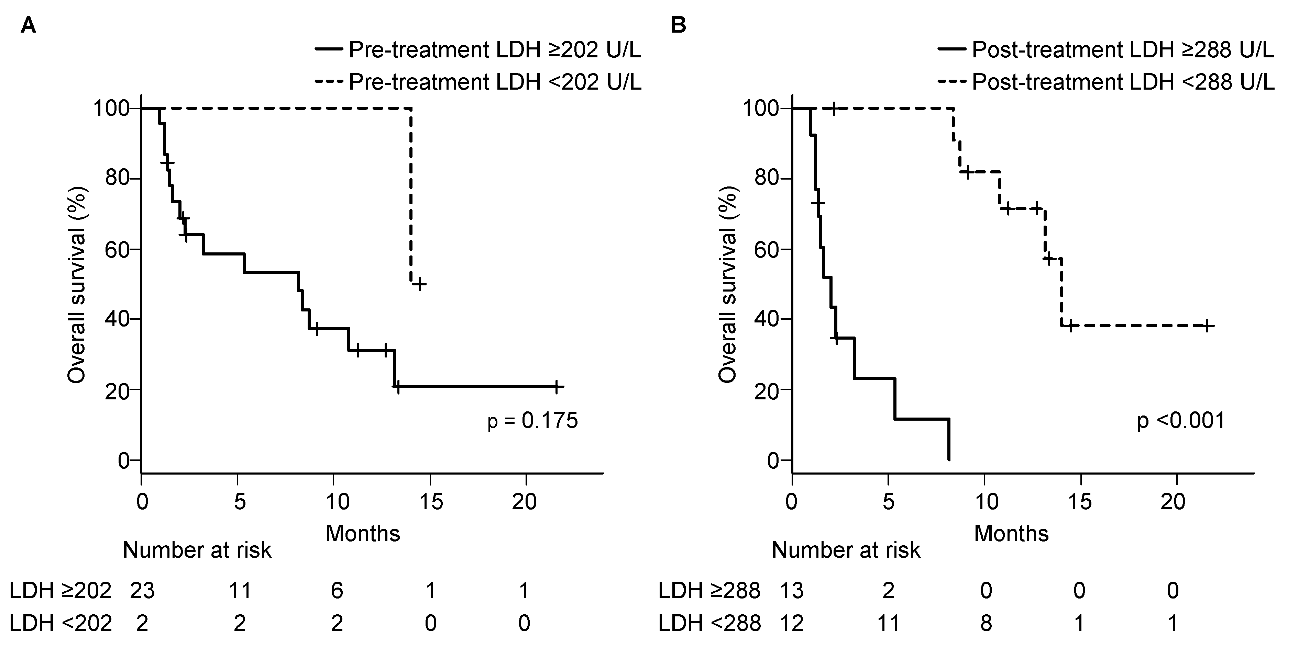
**Supplementary Figure 2. Survival analysis.** Overall survival analysis using the Kaplan–Meier method in 25 patients (A) with a pre-treatment lactate dehydrogenase (LDH) ≥202 U/L and <202 U/L and (B) a post-treatment LDH ≥288 U/L and <288 U/L.
